# Supplementary material
Source: HighWire-hosted journal article supplement (https://www.jneurosci.org/highwire/filestream/601954/field_highwire_adjunct_files/1/Supplemental_Legend.pdf)
Supplement: Supplemental_Legend.pdf [file Supplemental_Legend.pdf]

**Supplemental Fig S1 : Effects of pharmacological intraPF injections on spectral properties of LFPs recorded in the cortex and hippocampus.**

Amplitude spectrum (a.u., arbitrary units obtained for each region by normalizing the whole amplitude spectrum by its mean value at frequencies above 100 Hz) of LFPs frequencies recorded in the hippocampus (left panel) and in the cortex (right panel) of mice before (purple line), and after (0-20 min : red line ; 20-40 min : green line) the intraPF injection of **A**, CGP40116, 4 pmoles/side (n=8 mice) or **B**, muscimol, 35 pmoles/side (n=8 mice).
